# Supplementary material
Source: Royal Society of Chemistry journal article supplement (doi:10.1039/d6ce00290k)
Supplement: d6ce00290k1.pdf [file d6ce00290k1.pdf]

## Supplementary Information

# Construction of Pnictogen-Rich Cyclophosphazene-Based Manganese(II) Coordination Polymers: Structural Insights and Visible-Light Photocatalytic Activity

Rabia Emir<sup>a</sup>, Elif Özcan<sup>\*a</sup> and Yunus Zorlu<sup>\*a</sup>

<sup>a</sup>Gebze Technical University, Chemistry Department, 41400, Gebze-Kocaeli, Türkiye

## Table of Contents

**Scheme S1.** Synthesis route of **H<sub>4</sub>L**.

**Figure S1.** FTIR spectra of **H<sub>4</sub>L**, **PCP-27**, **PCP-28**, and **PCP-29**.

**Figure S2.** TGA curves of ligand (**H<sub>4</sub>L**) and PCPs (**PCP-27**, **PCP-28**, **PCP-29**).

**Figure S3.** Kubelka-Munk Plot of (a) **PCP-27** (b) **PCP-28** (c) **PCP-29**. UV-Vis absorption spectra of (d) **PCP-27** (e) **PCP-28** and (f) **PCP-29**.

**Figure S4.** SEM images of (a) **PCP-27** (b) **PCP-28** (c) **PCP-29**.

**Figure S5.** Structure and properties of the model pollutants to be used in photocatalysis studies.

**Figure S6.** EPR detection of O<sub>2</sub><sup>•-</sup> radical of **PCP-27** catalyst (a) and **PCP-29** (b).

**Figure S7.** PXRD patterns of PCPs **27** (a), **28** (b), and **29** (c) showing simulated (black), experimental (red), and after photocatalysis (blue) results, confirming phase purity and structural stability.

**Figure S8.** Transient photocurrent response of **PCP-27**, **PCP-28**, and **PCP-29** under periodic visible-light irradiation.

**Figure S9.** Schematic band alignment diagram of **PCP-27**, **PCP-28**, and **PCP-29** showing the calculated conduction band (CB) and valence band (VB) positions relative to the redox potentials of reactive oxygen species generation pathways, including O<sub>2</sub>/O<sub>2</sub><sup>•-</sup> (-0.33 V), OH<sup>-</sup>/•OH (+1.99 V), and hole (h<sup>+</sup>) oxidation processes.

**Figure S10.** Comprehensive schematic illustration of the photocatalytic mechanisms of **PCP-27**, **PCP-28**, and **PCP-29** under visible-light irradiation, showing charge carrier generation, electron/hole migration pathways, band positions, dominant reactive oxygen species formation (O<sub>2</sub><sup>•-</sup>, •OH, and h<sup>+</sup>), and the overall degradation pathway of dye molecules into final mineralization products.

**Figure S11.** Post-catalytic PXRD patterns of recovered photocatalysts after five reuse cycles.

**Figure S12.** Post-catalytic EDX analysis of recovered photocatalysts after five reuse cycles.

**Table S1.** Selected FT-IR spectral data for **H<sub>4</sub>L** (cm<sup>-1</sup>).

**Table S2.** Selected FT-IR spectral data for PCPs (cm<sup>-1</sup>).

**Table S3.** The pseudo first-order rate constants *k* (min<sup>-1</sup>) and the corresponding square of the correlation coefficients R<sup>2</sup> data for the photocatalytic degradation reactions of MB and RhB catalyzed by PCPs.

**Table S4.** Photocatalytic removal performances of **PCP-27**, **PCP-28** and **PCP-29**.

**Table S5.** Elemental composition of **PCP-27**, **PCP-28**, and **PCP-29** obtained from EDX analysis after photocatalytic stability tests.

**Table S6.** Crystallographic data and structure refinement details for PCPs.

**Table S7.** Selected bond lengths (Å) and bond angles (°) for **PCP-27**.

**Table S8.** Selected bond lengths (Å) and bond angles (°) for **PCP-28**.

**Table S9.** Selected bond lengths (Å) and bond angles (°) for **PCP-29**.

**Table S10.** Comparison of photocatalytic activity of Mn(II) PCPs from literature and PCPs synthesized in this study.

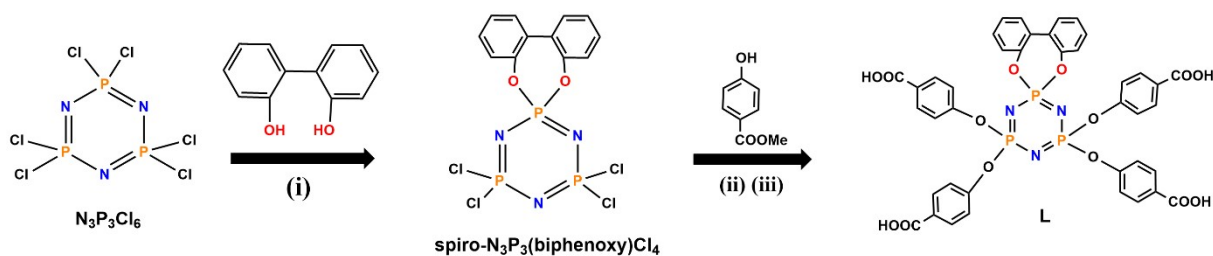

**Scheme S1.** Synthesis route of **H<sub>4</sub>L**. **i).** K<sub>2</sub>CO<sub>3</sub>, Acetone, rt; **ii).** K<sub>2</sub>CO<sub>3</sub>, Acetone, reflux; **iii).** NaOH, MeOH, 80 °C/ pH 2-3 with 0.1 M HCl.

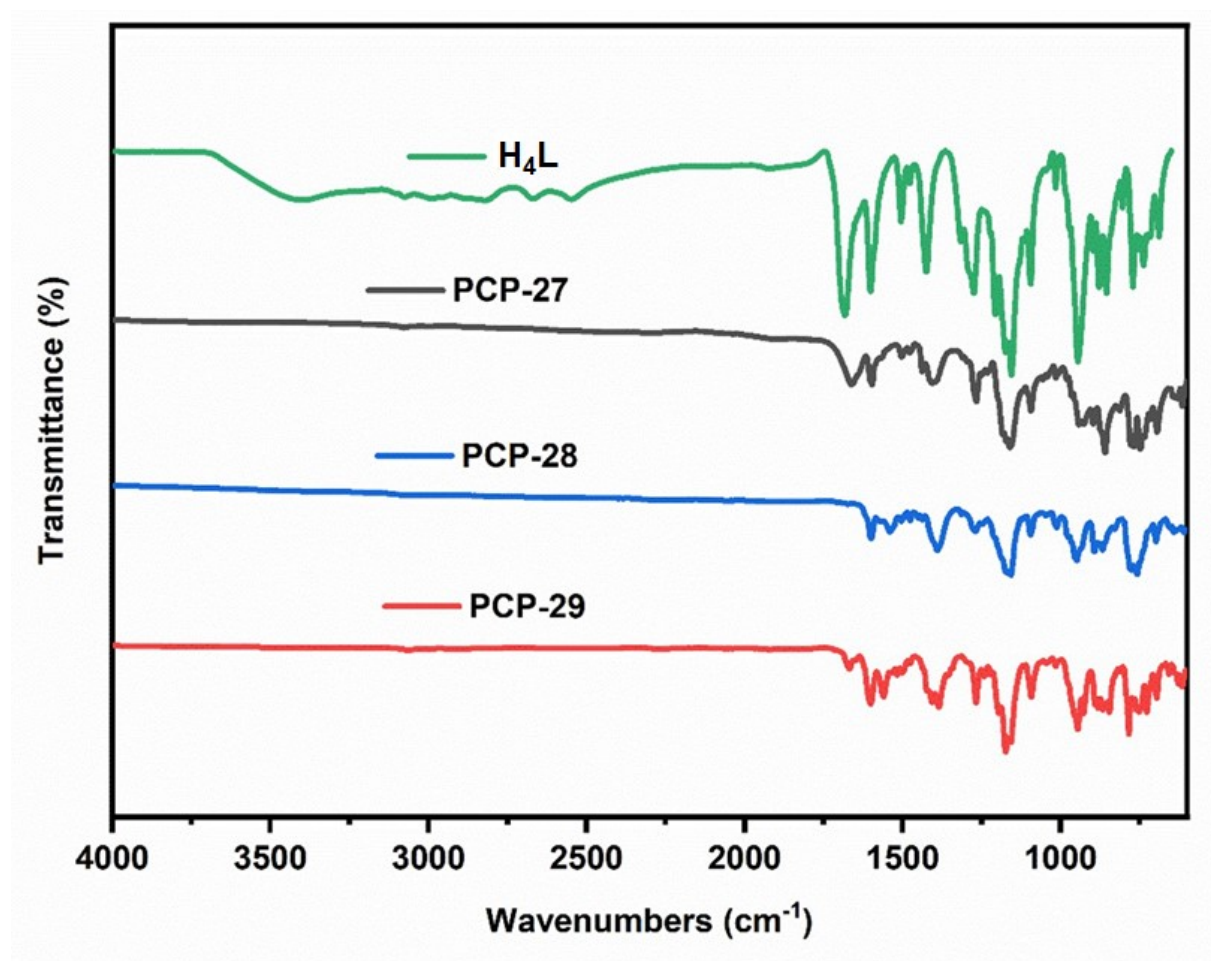

**Figure S1.** FTIR spectra of **H<sub>4</sub>L**, **PCP-27**, **PCP-28**, and **PCP-29**.

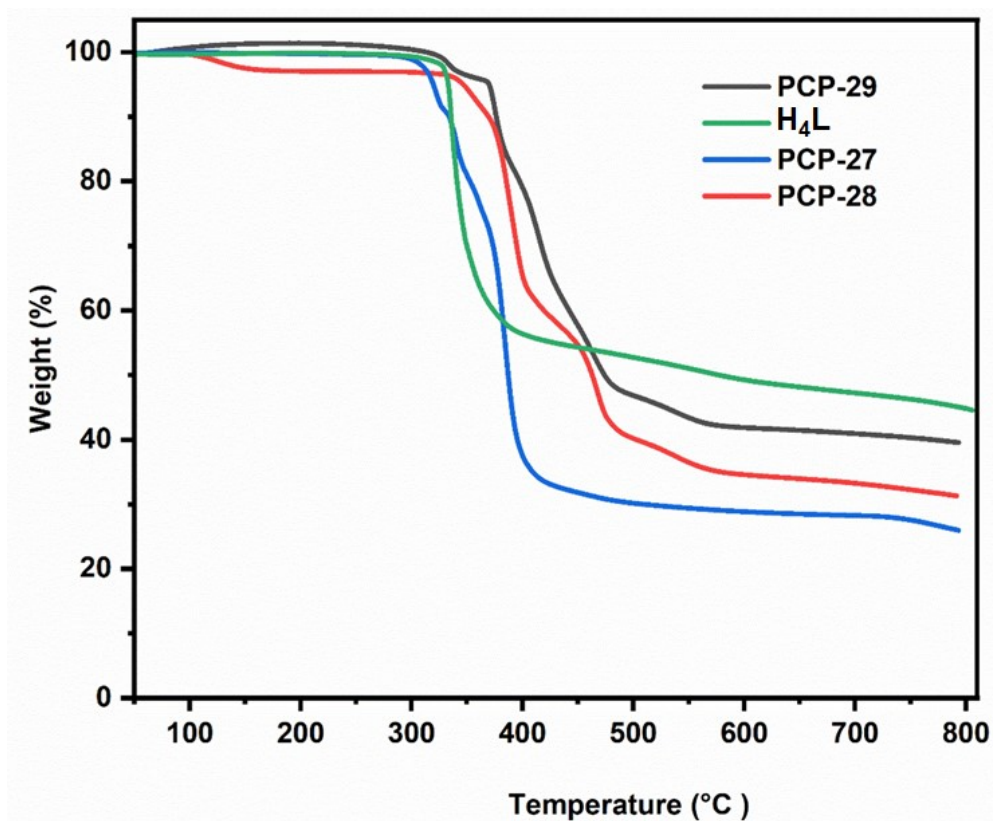

**Figure S2.** TGA curves of ligand ( $H_4L$ ) and PCPs (**PCP-27**, **PCP-28**, **PCP-29**).

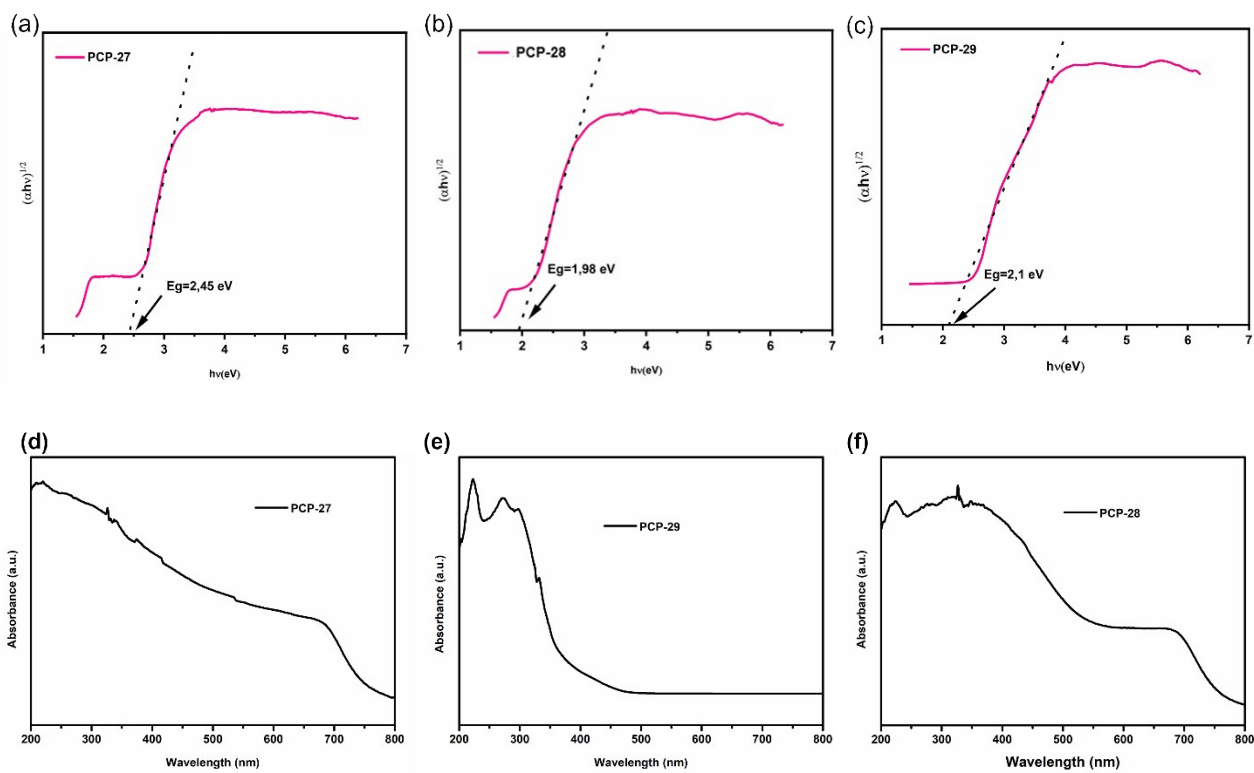

**Figure S3.** (a) Kubelka-Munk Plot of (a) **PCP-27** (b) **PCP-28** (c) **PCP-29**. UV-Vis absorption spectra of (d) **PCP-27** (e) **PCP-28** and (f) **PCP-29**.

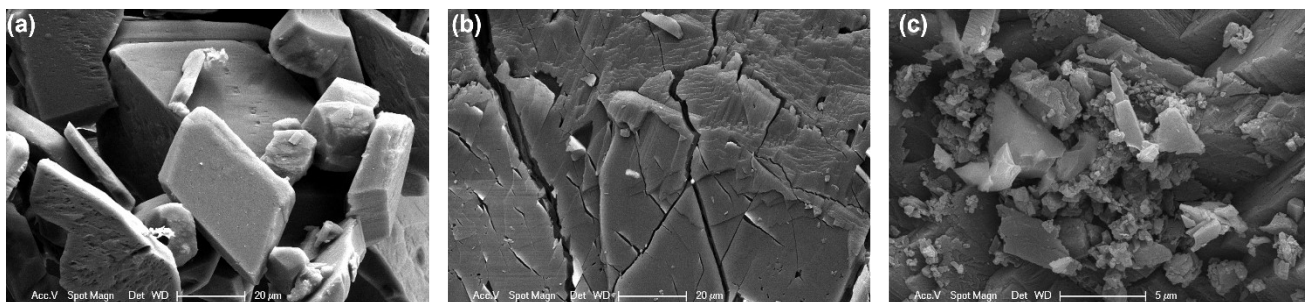

**Figure S4.** SEM images of (a) PCP-27 (b) PCP-28 (c) PCP-29.

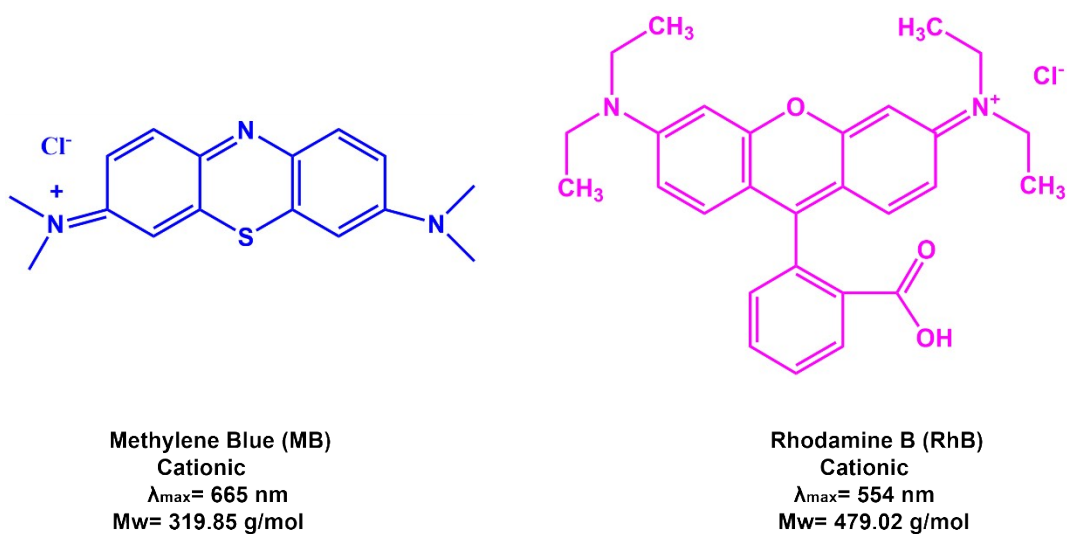

**Figure S5.** Structure and properties of the model pollutants to be used in photocatalysis studies.

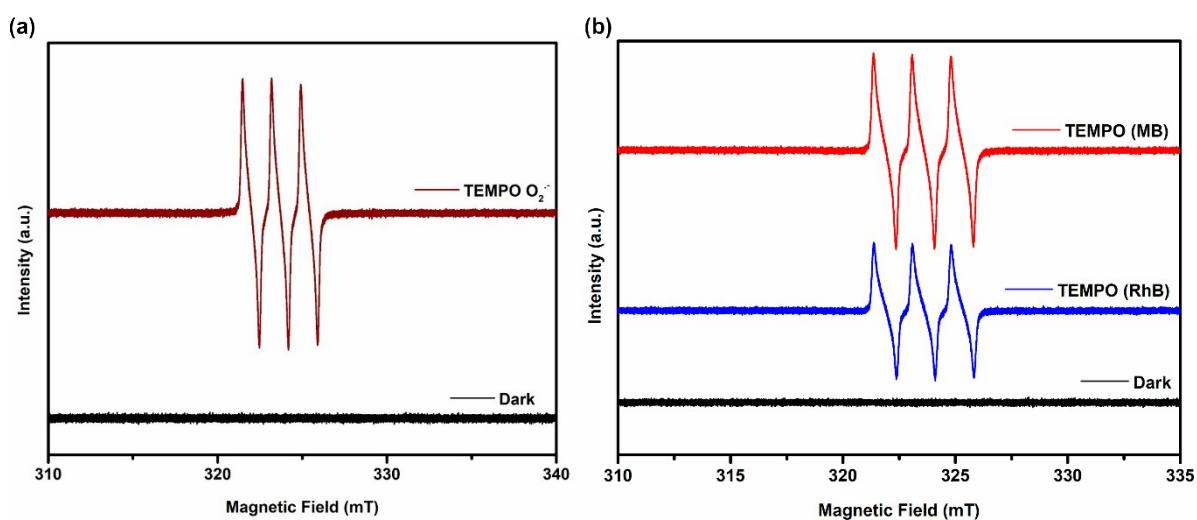

**Figure S6.** EPR detection of  $\text{O}_2^{\cdot-}$  radical of PCP-27 catalyst (a) and PCP-29 (b).

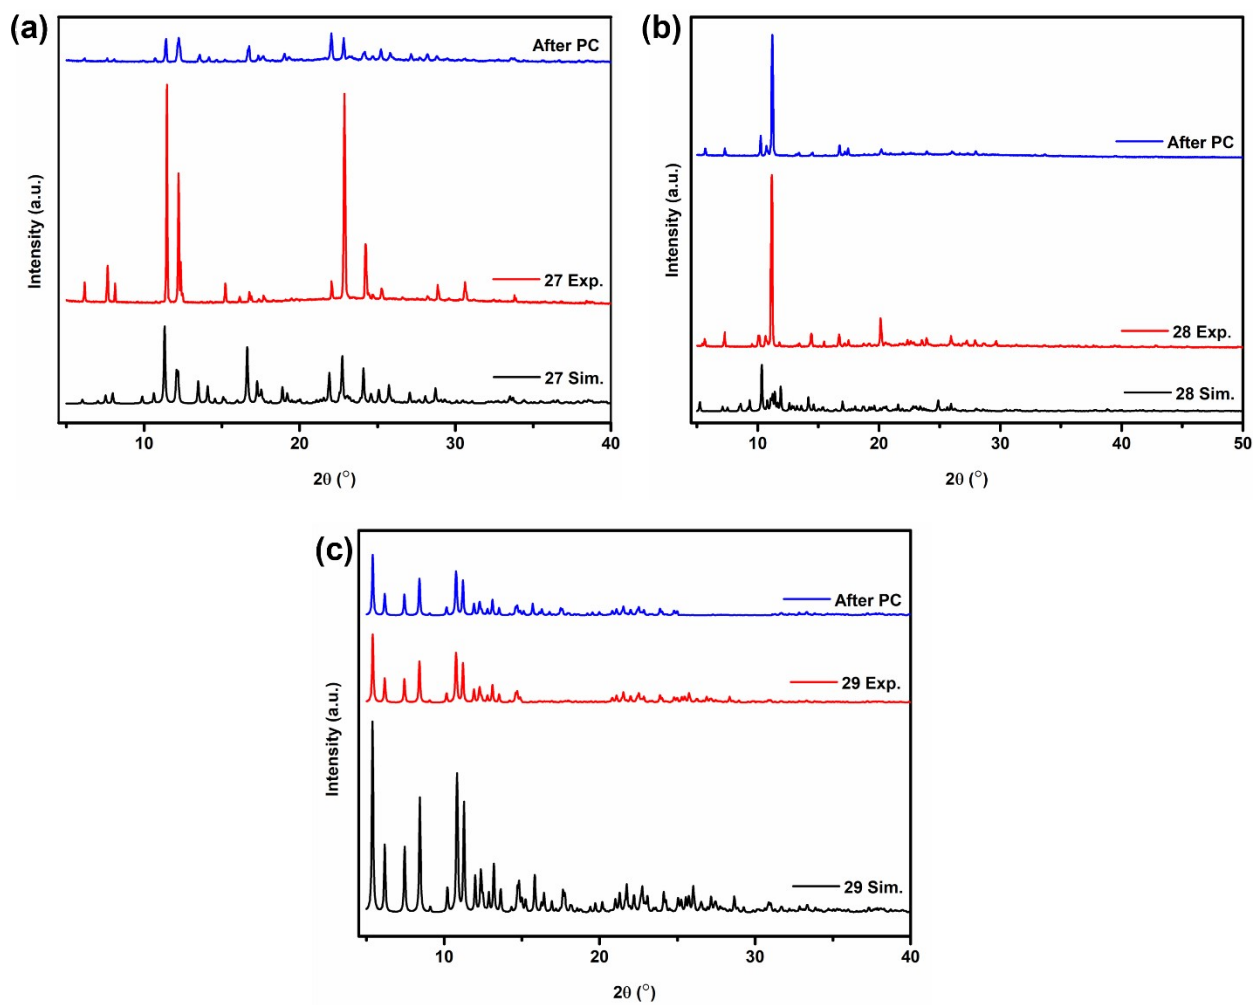

**Figure S7.** PXRD patterns of PCPs **27** (a), **28** (b), and **29** (c) showing simulated (black), experimental (red), and after photocatalysis (blue) results, confirming phase purity and structural stability.

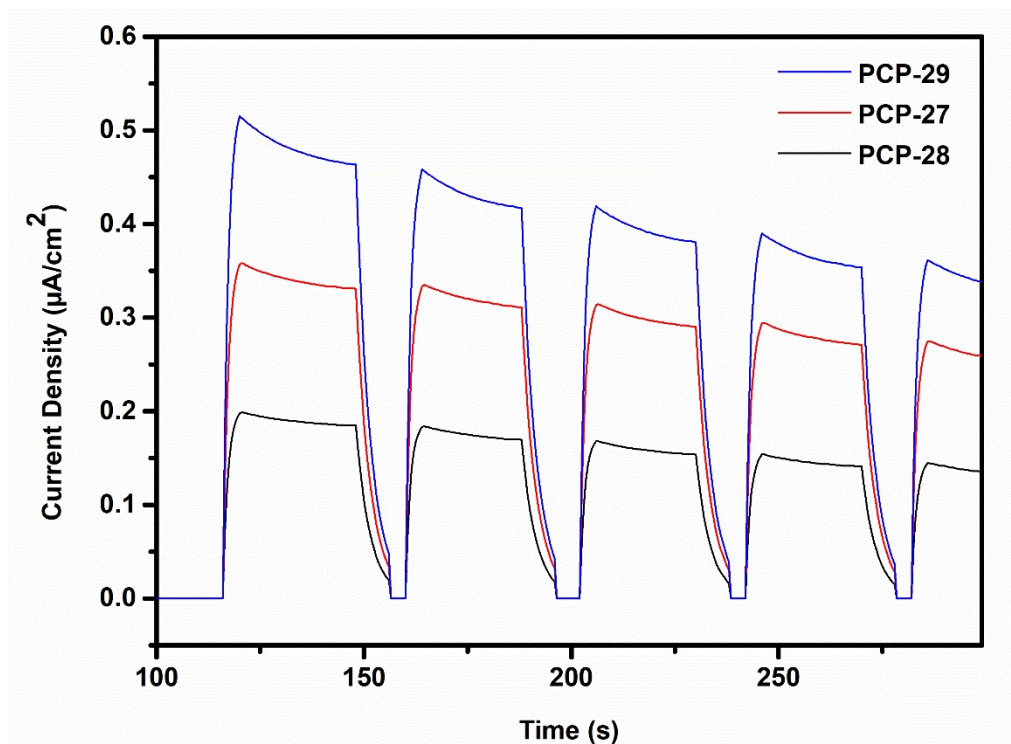

**Figure S8.** Transient photocurrent response of **PCP-27**, **PCP-28**, and **PCP-29** under periodic visible-light irradiation.

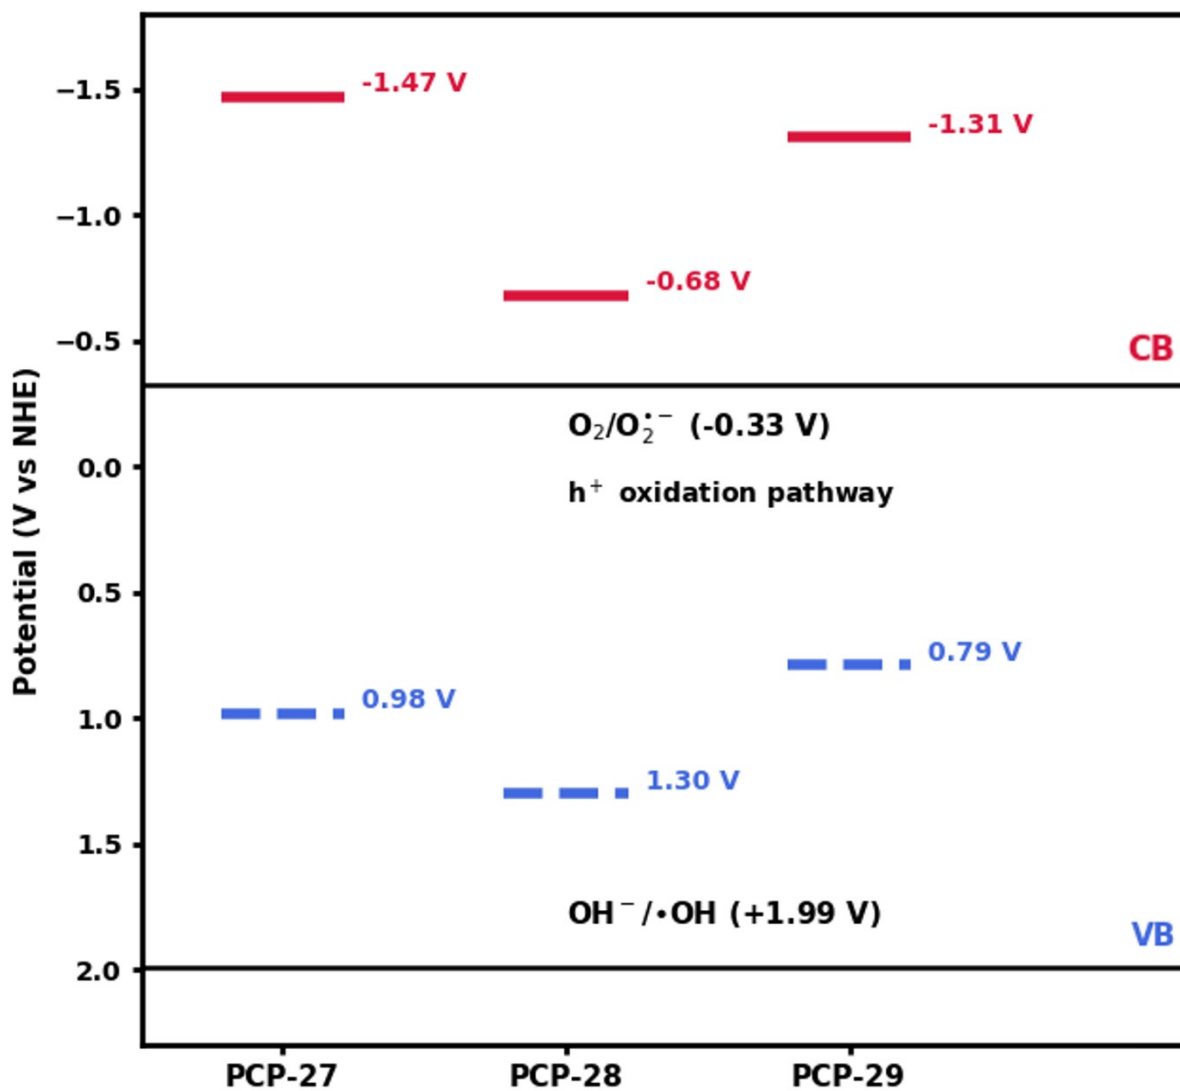

**Figure S9.** Schematic band alignment diagram of PCP-27, PCP-28, and PCP-29 showing the calculated conduction band (CB) and valence band (VB) positions relative to the redox potentials of reactive oxygen species generation pathways, including  $O_2/O_2^{\cdot-}$  (-0.33 V),  $OH^-/\cdot OH$  (+1.99 V), and hole ( $h^+$ ) oxidation processes.

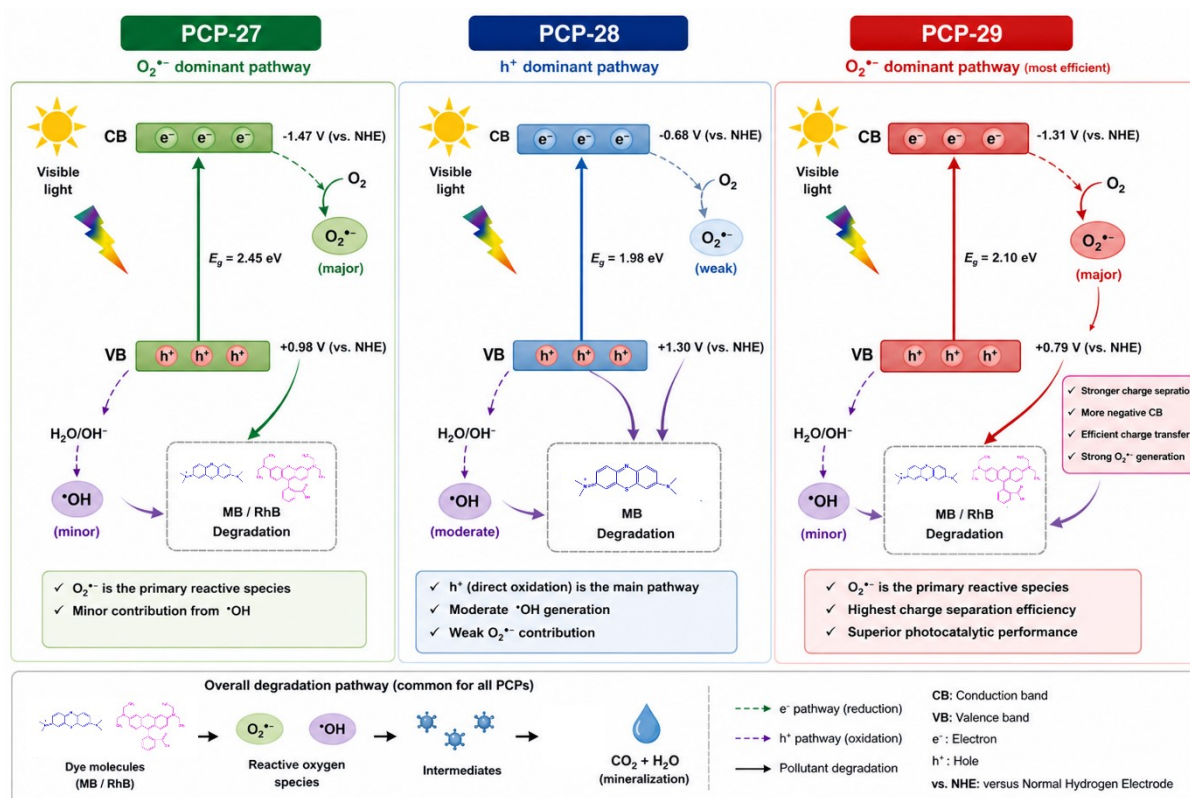

**Figure S10.** Comprehensive schematic illustration of the photocatalytic mechanisms of **PCP-27**, **PCP-28**, and **PCP-29** under visible-light irradiation, showing charge carrier generation, electron/hole migration pathways, band positions, dominant reactive oxygen species formation (O<sub>2</sub><sup>•-</sup>, •OH, and h<sup>+</sup>), and the overall degradation pathway of dye molecules into final mineralization products.

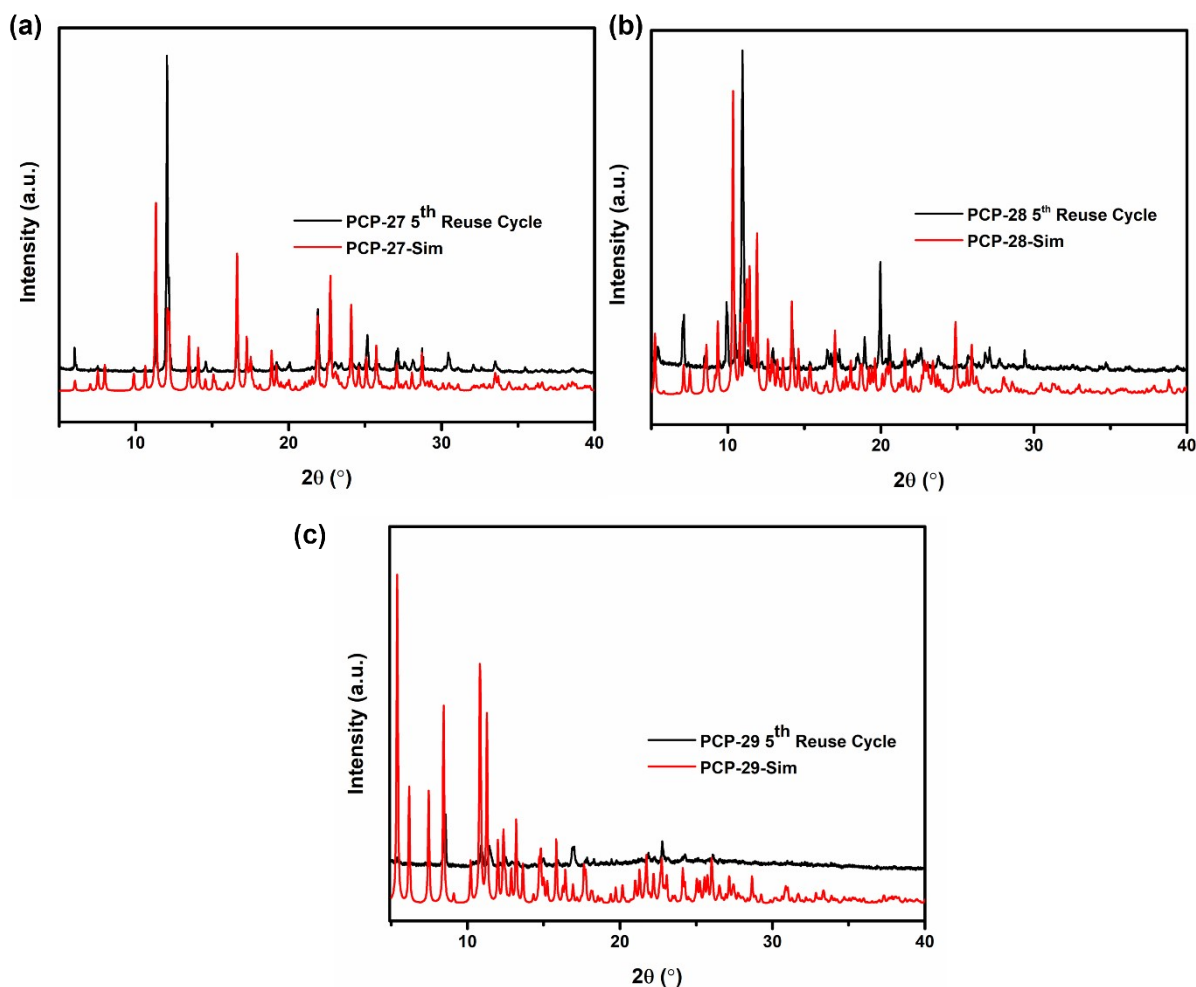

**Figure S11.** Post-catalytic PXRD patterns of recovered photocatalysts after five reuse cycles.

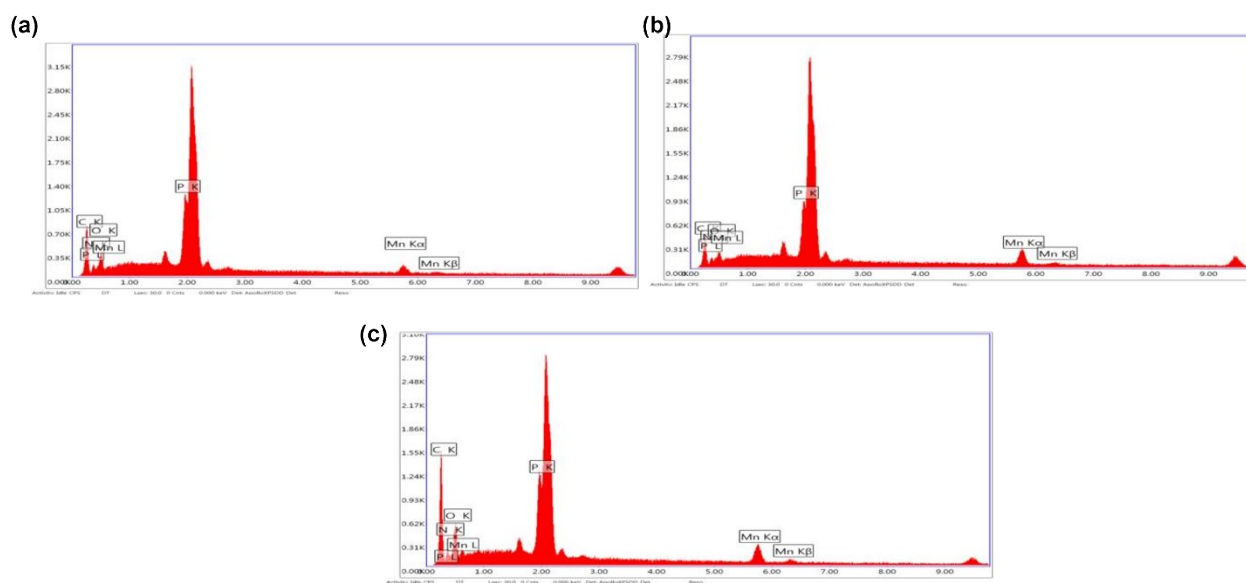

**Figure S12.** Post-catalytic EDX analysis of recovered photocatalysts after five reuse cycles. (a) PCP-27 (b) PCP-28 (c) PCP-29.

**Table S1.** Selected FT-IR spectral data for **H<sub>4</sub>L** (cm<sup>-1</sup>).

| Ligand                | $\nu_{(\text{C-H})\text{arom.}}$ | $\nu_{(\text{C-H})\text{alif}}$ | $\nu_{(\text{C=O})}$ | $\nu_{(\text{P=N})}$ | $\nu_{(\text{P-O-C})}$ | $\nu_{(\text{C=C})}$ | $\nu_{(\text{O-H})}$ |
|-----------------------|----------------------------------|---------------------------------|----------------------|----------------------|------------------------|----------------------|----------------------|
| <b>H<sub>4</sub>L</b> | 3080                             | 2827                            | 1681                 | 1263, 1158           | 1094                   | 1504                 | 3415                 |

**Table S2.** Selected FT-IR spectral data for PCPs (cm<sup>-1</sup>).

| PCP           | $\nu_{(\text{C=O})}$                             | $\nu_{(\text{P=N})}$ | $\nu_{(\text{C=C})}$ | $\nu_{(\text{C-H})\text{arom.}}$ |
|---------------|--------------------------------------------------|----------------------|----------------------|----------------------------------|
| <b>PCP-27</b> | $\nu_{\text{as}}1657$<br>$\nu_{\text{s}} = 1340$ | 1263, 1158           | 1511                 | 3080                             |
| <b>PCP-28</b> | $\nu_{\text{as}}1605$<br>$\nu_{\text{s}} = 1381$ | 1262, 1152           | 1534                 | 3085                             |
| <b>PCP-29</b> | $\nu_{\text{as}}1657$<br>$\nu_{\text{s}} = 1381$ | 1270, 1170           | 1552                 | 3080                             |

**Table S3.** The pseudo first-order rate constants  $k$  (min<sup>-1</sup>) and the corresponding square of the correlation coefficients  $R^2$  data for the photocatalytic degradation reactions of MB and RhB catalyzed by PCPs.

|               | <b>MB</b>            | <b>RhB</b>           |
|---------------|----------------------|----------------------|
| <b>PCP-27</b> | 0.02675<br>(0.96642) | 0.01358<br>(0.95922) |
| <b>PCP-28</b> | 0.00877<br>(0.97923) | -                    |
| <b>PCP-29</b> | 0.0232<br>(0.93126)  | 0.02311<br>(0.94222) |

**Table S4.** Photocatalytic removal performances of **PCP-27**, **PCP-28** and **PCP-29**.

| PCPs          | MB         |                   |                       | RhB        |                   |                       |
|---------------|------------|-------------------|-----------------------|------------|-------------------|-----------------------|
|               | Time (min) | Dye Degradation % | 5 <sup>th</sup> Run % | Time (min) | Dye Degradation % | 5 <sup>th</sup> Run % |
| <b>PCP-27</b> | 90         | 90                | 55                    | 90         | 75.444            | 66.40                 |
| <b>PCP-28</b> | 90         | 59                | 40                    | 90         | -                 | -                     |
| <b>PCP-29</b> | 90         | 91                | 70                    | 90         | 91.723            | 70.15                 |

**Table S5.** Elemental composition of **PCP-27**, **PCP-28**, and **PCP-29** obtained from EDX analysis after photocatalytic stability tests.

| Element | PCP-27 | PCP-27 | PCP-28 | PCP-28 | PCP-29 | PCP-29 |
|---------|--------|--------|--------|--------|--------|--------|
|         | (wt%)  | (wt%)  | (wt%)  | (wt%)  | (wt%)  | (wt%)  |
| C       | 45.40  | 60.60  | 37.80  | 56.97  | 47.81  | 62.37  |
| N       | 10.16  | 11.63  | 10.37  | 13.40  | 11.05  | 12.36  |
| O       | 14.02  | 14.05  | 8.48   | 9.59   | 14.94  | 14.63  |
| P       | 21.42  | 11.09  | 22.61  | 13.21  | 14.36  | 7.27   |
| Mn      | 8.99   | 2.62   | 20.74  | 6.83   | 11.84  | 3.38   |

**Table S6.** Crystallographic data and structure refinement details for PCPs.

| Identification Code                               | PCP-27                                                                          | PCP-28                                                                                         | PCP-29                                                                                        |
|---------------------------------------------------|---------------------------------------------------------------------------------|------------------------------------------------------------------------------------------------|-----------------------------------------------------------------------------------------------|
| <b>Empirical formula</b>                          | C <sub>50</sub> H <sub>34</sub> MnN <sub>5</sub> O <sub>14</sub> P <sub>3</sub> | C <sub>73</sub> H <sub>57</sub> Mn <sub>2</sub> N <sub>10</sub> O <sub>17</sub> P <sub>3</sub> | C <sub>67</sub> H <sub>49</sub> Mn <sub>2</sub> N <sub>8</sub> O <sub>16</sub> P <sub>3</sub> |
| <b>Formula weight</b>                             | 1076.67                                                                         | 1549.07                                                                                        | 1424.93                                                                                       |
| <b>Temperature/K</b>                              | 298                                                                             | 298                                                                                            | 298                                                                                           |
| <b>Crystal system</b>                             | triclinic                                                                       | triclinic                                                                                      | triclinic                                                                                     |
| <b>Space group</b>                                | P-1                                                                             | P-1                                                                                            | P-1                                                                                           |
| <b>a/Å</b>                                        | 11.821(3)                                                                       | 13.670(3)                                                                                      | 8.8654(17)                                                                                    |
| <b>b/Å</b>                                        | 13.087(4)                                                                       | 15.542(3)                                                                                      | 17.045(4)                                                                                     |
| <b>c/Å</b>                                        | 15.171(5)                                                                       | 17.631(4)                                                                                      | 21.439(4)                                                                                     |
| <b>α/°</b>                                        | 104.938(6)                                                                      | 78.702(5)                                                                                      | 78.045(4)                                                                                     |
| <b>β/°</b>                                        | 91.171(6)                                                                       | 76.263(5)                                                                                      | 84.341(4)                                                                                     |
| <b>γ/°</b>                                        | 95.993(6)                                                                       | 83.265(5)                                                                                      | 78.032(4)                                                                                     |
| <b>Volume/Å<sup>3</sup></b>                       | 2252.4(11)                                                                      | 3558.3(13)                                                                                     | 3095.3(11)                                                                                    |
| <b>Z</b>                                          | 2                                                                               | 2                                                                                              | 2                                                                                             |
| <b>ρ<sub>calc</sub>/g/cm<sup>3</sup></b>          | 1.587                                                                           | 1.446                                                                                          | 1.529                                                                                         |
| <b>μ/mm<sup>-1</sup></b>                          | 0.479                                                                           | 0.500                                                                                          | 0.565                                                                                         |
| <b>F(000)</b>                                     | 1102.0                                                                          | 1592.0                                                                                         | 1460.0                                                                                        |
| <b>Crystal size/mm<sup>3</sup></b>                | 0.23 × 0.12 × 0.05                                                              | 0.32 × 0.14 × 0.11                                                                             | 0.28 × 0.22 × 0.12                                                                            |
| <b>Radiation</b>                                  | MoKα (λ = 0.71073)                                                              | MoKα (λ = 0.71073)                                                                             | MoKα (λ = 0.71073)                                                                            |
| <b>2θ range for data collection/°</b>             | 3.242 to 50.348                                                                 | 2.414 to 50.28                                                                                 | 3.44 to 50.202                                                                                |
| <b>Index ranges</b>                               | -13 ≤ h ≤ 14, -15 ≤ k ≤ 15, -18 ≤ l ≤ 18                                        | -16 ≤ h ≤ 16, -18 ≤ k ≤ 18, -21 ≤ l ≤ 21                                                       | -10 ≤ h ≤ 10, -20 ≤ k ≤ 20, -25 ≤ l ≤ 25                                                      |
| <b>Reflections collected</b>                      | 22915                                                                           | 44553                                                                                          | 29669                                                                                         |
| <b>Independent reflections</b>                    | 8030<br>[R <sub>int</sub> = 0.0664, R <sub>sigma</sub> = 0.0907]                | 12605<br>[R <sub>int</sub> = 0.0863, R <sub>sigma</sub> = 0.1016]                              | 10964<br>[R <sub>int</sub> = 0.0832, R <sub>sigma</sub> = 0.1302]                             |
| <b>Data/restraints/parameters</b>                 | 8030/1/662                                                                      | 12605/642/883                                                                                  | 10964/0/811                                                                                   |
| <b>Goodness-of-fit on F<sup>2</sup></b>           | 0.995                                                                           | 1.058                                                                                          | 0.930                                                                                         |
| <b>Final R indexes [I ≥ 2σ (I)]</b>               | R <sub>1</sub> = 0.0517, wR <sub>2</sub> = 0.1130                               | R <sub>1</sub> = 0.0838, wR <sub>2</sub> = 0.2374                                              | R <sub>1</sub> = 0.0529, wR <sub>2</sub> = 0.1101                                             |
| <b>Final R indexes [all data]</b>                 | R <sub>1</sub> = 0.1056, wR <sub>2</sub> = 0.1355                               | R <sub>1</sub> = 0.1350, wR <sub>2</sub> = 0.2685                                              | R <sub>1</sub> = 0.1094, wR <sub>2</sub> = 0.1309                                             |
| <b>Largest diff. peak/hole / e Å<sup>-3</sup></b> | 0.52/-0.56                                                                      | 0.57/-0.50                                                                                     | 0.29/-0.40                                                                                    |

**Table S7.** Selected bond lengths (Å) and bond angles (°) for PCP-27.

| Bond Lengths (Å)    |           |           |
|---------------------|-----------|-----------|
| Mn1—O2 <sup>i</sup> | 2.323 (3) | P1—N2     |
|                     |           | 1.578 (3) |

|                                      |             |                                      |             |
|--------------------------------------|-------------|--------------------------------------|-------------|
| Mn1—O4 <sup>i</sup>                  | 2.075 (3)   | P1—N1                                | 1.583 (3)   |
| Mn1—O13                              | 2.061 (3)   | P3—N3                                | 1.571 (3)   |
| Mn1—N4                               | 2.272 (3)   | P2—N1                                | 1.571 (3)   |
| Mn1—N5                               | 2.256 (3)   | P2—N3                                | 1.579 (3)   |
|                                      |             | P3—N2                                | 1.570 (3)   |
| <b>Bond Angles (°)</b>               |             |                                      |             |
| O4 <sup>i</sup> —Mn1—O2 <sup>i</sup> | 80.61 (12)  | O4 <sup>i</sup> —Mn1—O2 <sup>i</sup> | 80.61 (12)  |
| O4 <sup>i</sup> —Mn1—N4              | 83.90 (12)  | O4 <sup>i</sup> —Mn1—N4              | 83.90 (12)  |
| O4 <sup>i</sup> —Mn1—N5              | 147.19 (12) | O4 <sup>i</sup> —Mn1—N5              | 147.19 (12) |
| O13—Mn1—O2 <sup>i</sup>              | 91.22 (11)  | O13—Mn1—O2 <sup>i</sup>              | 91.22 (11)  |
| O13—Mn1—O4 <sup>i</sup>              | 127.42 (11) | O13—Mn1—O4 <sup>i</sup>              | 127.42 (11) |
| O13—Mn1—N4                           | 139.74 (12) | O13—Mn1—N4                           | 139.74 (12) |
| O13—Mn1—N5                           | 84.86 (11)  | O13—Mn1—N5                           | 84.86 (11)  |
| N4—Mn1—O2 <sup>i</sup>               | 121.61 (11) | N4—Mn1—O2 <sup>i</sup>               | 121.61 (11) |
| N5—Mn1—O2 <sup>i</sup>               | 94.62 (12)  | P3—N3—P2                             | 121.5 (2)   |
| N5—Mn1—O2 <sup>i</sup>               | 94.62 (12)  | P2—N1—P1                             | 123.47 (18) |
| N5—Mn1—N4                            | 70.98 (12)  | P3—N2—P1                             | 122.7 (2)   |
| N2—P3—N3                             | 118.09 (16) | P3—N2—P1                             | 122.7 (2)   |
| N1—P2—N3                             | 117.23 (17) | N2—P1—N1                             | 116.15 (16) |

Symmetry codes: (i)  $x, y+1, z+1$ .

**Table S8.** Selected bond lengths (Å) and bond angles (°) for **PCP-28**.

|                         |             |                                      |             |
|-------------------------|-------------|--------------------------------------|-------------|
| <b>Bond Lengths (Å)</b> |             |                                      |             |
| Mn1—O1                  | 2.034 (5)   | Mn2—N5                               | 2.252 (6)   |
| Mn1—O7 <sup>i</sup>     | 2.077 (6)   | Mn2—N6                               | 2.252 (6)   |
| Mn1—N1                  | 2.274 (6)   | Mn2—N4                               | 2.340 (6)   |
| Mn1—N2                  | 2.216 (5)   | P3—N7                                | 1.586 (5)   |
| Mn1—N3                  | 2.252 (7)   | P3—N8                                | 1.569 (5)   |
| Mn2—O3                  | 2.489 (6)   | P1—N7                                | 1.568 (5)   |
| Mn2—O4                  | 2.169 (5)   | P1—N9                                | 1.572 (5)   |
| Mn2—O5 <sup>i</sup>     | 2.415 (5)   | P2—N8                                | 1.578 (5)   |
| Mn2—O6 <sup>i</sup>     | 2.219 (5)   | P2—N9                                | 1.585 (5)   |
| <b>Bond Angles (°)</b>  |             |                                      |             |
| O1—Mn1—O7 <sup>i</sup>  | 105.2 (2)   | O4—Mn2—O3                            | 55.5 (2)    |
| O1—Mn1—N1               | 87.0 (2)    | O4—Mn2—O5 <sup>i</sup>               | 83.19 (19)  |
| O1—Mn1—N2               | 109.3 (2)   | O4—Mn2—O6 <sup>i</sup>               | 105.2 (2)   |
| O1—Mn1—N3               | 105.5 (3)   | O4—Mn2—N4                            | 84.7 (2)    |
| O7 <sup>i</sup> —Mn1—N1 | 102.4 (2)   | O4—Mn2—N5                            | 146.0 (2)   |
| O7 <sup>i</sup> —Mn1—N2 | 144.6 (2)   | O4—Mn2—N6                            | 123.7 (2)   |
| O7 <sup>i</sup> —Mn1—N3 | 107.4 (3)   | O5 <sup>i</sup> —Mn2—O3              | 116.52 (18) |
| N2—Mn1—N1               | 71.8 (2)    | O6 <sup>i</sup> —Mn2—O3              | 160.8 (2)   |
| N2—Mn1—N3               | 71.2 (2)    | O6 <sup>i</sup> —Mn2—O5 <sup>i</sup> | 55.94 (17)  |
| N3—Mn1—N1               | 143.0 (2)   | O6 <sup>i</sup> —Mn2—N4              | 84.7 (2)    |
| O6 <sup>i</sup> —Mn2—N5 | 94.9 (2)    | N6—Mn2—N4                            | 139.6 (2)   |
| O6 <sup>i</sup> —Mn2—N6 | 110.4 (2)   | N5—Mn2—O3                            | 101.79 (19) |
| N5—Mn2—N4               | 69.9 (2)    | N7—P1—N9                             | 118.3 (3)   |
| N5—Mn2—N6               | 71.5 (2)    | N8—P3—N7                             | 117.4 (3)   |
| N6—Mn2—O3               | 84.2 (2)    | P1—N7—P3                             | 120.4 (3)   |
| N6—Mn2—O5 <sup>i</sup>  | 82.3 (2)    | P3—N8—P2                             | 122.1 (3)   |
| N4—Mn2—O3               | 92.1 (2)    | P1—N9—P2                             | 121.3 (3)   |
| N4—Mn2—O5 <sup>i</sup>  | 133.39 (19) | N8—P2—N9                             | 117.7 (3)   |

|                        |             |  |  |
|------------------------|-------------|--|--|
| N5—Mn2—O5 <sup>i</sup> | 130.76 (19) |  |  |
|------------------------|-------------|--|--|

Symmetry codes: (i)  $x, y-1, z$ ; (ii)  $x, y+1, z$ .

**Table S9.** Selected bond lengths (Å) and bond angles (°) for **PCP-29**.

| Bond Lengths (Å)                       |             |                                            |             |
|----------------------------------------|-------------|--------------------------------------------|-------------|
| Mn1—O7 <sup>i</sup>                    | 2.303 (3)   | Mn2—N7                                     | 2.252 (4)   |
| Mn1—O9 <sup>i</sup>                    | 2.128 (3)   | Mn2—N6                                     | 2.236 (4)   |
| Mn1—O12 <sup>ii</sup>                  | 2.229 (3)   | Mn2—O12 <sup>iii</sup>                     | 2.344 (3)   |
| Mn1—O13                                | 2.107 (3)   | P1—N1                                      | 1.577 (3)   |
| Mn1—N4                                 | 2.262 (3)   | P1—N3                                      | 1.578 (3)   |
| Mn1—N5                                 | 2.265 (3)   | P3—N3                                      | 1.566 (3)   |
| Mn2—O8                                 | 2.109 (3)   | P3—N2                                      | 1.593 (3)   |
| Mn2—O10                                | 2.098 (3)   | P2—N1                                      | 1.577 (3)   |
| Mn2—O11 <sup>iii</sup>                 | 2.279 (3)   | P2—N2                                      | 1.572 (3)   |
| Bond Angles (°)                        |             |                                            |             |
| O9 <sup>i</sup> —Mn1—O7 <sup>i</sup>   | 80.06 (11)  | O10—Mn2—O12 <sup>iii</sup>                 | 99.50 (11)  |
| O9 <sup>i</sup> —Mn1—O12 <sup>ii</sup> | 102.68 (11) | O10—Mn2—N6                                 | 95.51 (13)  |
| O9 <sup>i</sup> —Mn1—N4                | 94.44 (13)  | O10—Mn2—N7                                 | 167.43 (13) |
| O9 <sup>i</sup> —Mn1—N5                | 166.47 (11) | O11 <sup>iii</sup> —Mn2—O12 <sup>iii</sup> | 56.77 (9)   |
| O12 <sup>ii</sup> —Mn1—O7 <sup>i</sup> | 87.42 (11)  | N7—Mn2—O12 <sup>iii</sup>                  | 92.87 (11)  |
| O12 <sup>ii</sup> —Mn1—N4              | 160.26 (12) | N6—Mn2—O11 <sup>iii</sup>                  | 85.11 (11)  |
| O12 <sup>ii</sup> —Mn1—N5              | 88.86 (11)  | N6—Mn2—O12 <sup>iii</sup>                  | 138.53 (10) |
| O13—Mn1—O7 <sup>i</sup>                | 165.14 (12) | N6—Mn2—N7                                  | 73.49 (13)  |
| O13—Mn1—O9 <sup>i</sup>                | 86.74 (12)  | N7—Mn2—O11 <sup>iii</sup>                  | 95.38 (11)  |
| O13—Mn1—O12 <sup>ii</sup>              | 88.87 (10)  | O10—Mn2—O8                                 | 88.69 (12)  |
| O13—Mn1—N4                             | 101.97 (12) | O10—Mn2—O11 <sup>iii</sup>                 | 89.60 (11)  |
| O13—Mn1—N5                             | 100.70 (12) | O8—Mn2—N7                                  | 87.19 (12)  |
| N4—Mn1—O7 <sup>i</sup>                 | 85.94 (12)  | N1—P1—N3                                   | 117.20 (17) |
| N4—Mn1—N5                              | 73.06 (12)  | N2—P2—N1                                   | 118.06 (18) |
| N5—Mn1—O7 <sup>i</sup>                 | 93.61 (11)  | P2—N1—P1                                   | 122.0 (2)   |
| O8—Mn2—O11 <sup>iii</sup>              | 175.27 (12) | P2—N2—P3                                   | 122.1 (2)   |
| O8—Mn2—O12 <sup>iii</sup>              | 119.23 (12) | P3—N3—P1                                   | 122.8 (2)   |
| O8—Mn2—N6                              | 99.44 (13)  | N3—P3—N2                                   | 116.51 (18) |

Symmetry codes: (i)  $x-1, y+1, z$ ; (ii)  $x-1, y, z$ ; (iii)  $x, y-1, z$ ; (iv)  $x+1, y-1, z$ ; (v)  $x, y+1, z$ ; (vi)  $x+1, y, z$ .

**Table S10.** Comparison of photocatalytic activity of Mn(II) PCPs from literature and PCPs synthesized in this study.

| Coordination Polymers                                                  | Dye | Light Source                        | Time (min) | % Degradation | Ref. |
|------------------------------------------------------------------------|-----|-------------------------------------|------------|---------------|------|
| [Mn(cpip)(NO <sub>2</sub> -bdc)] <sub>n</sub> ·0.5H <sub>2</sub> O (2) | CR  | Visible light ( $\lambda > 420$ nm) | 120        | 95.84         | [1]  |
| [Mn(cpip)(NO <sub>2</sub> -bdc)] <sub>n</sub> ·0.5H <sub>2</sub> O (2) | MV  | Visible light ( $\lambda > 420$ nm) | 120        | 90.32         | [1]  |
| [Mn(cpip)(NO <sub>2</sub> -bdc)] <sub>n</sub> ·0.5H <sub>2</sub> O (2) | MB  | Visible light ( $\lambda > 420$ nm) | 120        | 84.87         | [1]  |
| [Mn <sub>2</sub> (cpip) <sub>2</sub> (HO-bdc)] <sub>n</sub> (1)        | CR  | Visible light ( $\lambda > 420$ nm) | 120        | 69.24         | [1]  |
| [Mn <sub>2</sub> (cpip) <sub>2</sub> (HO-bdc)] <sub>n</sub> (1)        | MV  | Visible light ( $\lambda > 420$ nm) | 120        | 35.18         | [1]  |
| [Mn <sub>2</sub> (cpip) <sub>2</sub> (HO-bdc)] <sub>n</sub> (1)        | MB  | Visible light ( $\lambda > 420$ nm) | 120        | 54.56         | [1]  |
| {Mn(bimb)(2,6-NDA)} <sub>n</sub> (Mn-MOF)                              | MB  | White light (Xe lamp)               | 480        | 99.55         | [2]  |

|                                                                                         |          |                         |       |       |                   |
|-----------------------------------------------------------------------------------------|----------|-------------------------|-------|-------|-------------------|
| $[\text{Mn}_2(\text{L})(\text{bpy})(\text{H}_2\text{O})_2 \cdot 2\text{H}_2\text{O}]_n$ | MV       | UV                      | 50    | 93.1  | [3]               |
| Mn-MOF                                                                                  | MB       | Visible light (Xe lamp) | 63    | 60    | [4]               |
| Mn-MOF + H <sub>2</sub> O <sub>2</sub>                                                  | MB       | Visible light (Xe lamp) | 25    | 90    | [4]               |
| $[\text{Mn}(\text{SCN})_2(\text{peol})]_n$ (1D CP)                                      | Alizarin | Not specified           | 50    | 86.12 | [5]               |
| $[\text{Mn}_2\text{L}(1,10\text{-phen})_2]\text{DMF} \cdot 0.5\text{H}_2\text{O}$ (1)   | RhB      | UV Light                | 56.27 | 8 h   | [6]               |
| $[\text{Mn}(1,10\text{-phen})(\text{SO}_4)(\text{H}_2\text{O})_2]$ (2)                  | RhB      | UV Light                | 32.46 | 8 h   | [6]               |
| <b>PCP-28</b>                                                                           | MB       | Visible                 | 90    | 68    | <b>This Study</b> |
| <b>PCP-29</b>                                                                           | MB       | Visible                 | 90    | 92    | <b>This Study</b> |
| <b>PCP-27</b>                                                                           | RhB      | Visible                 | 90    | 75.44 | <b>This Study</b> |
| <b>PCP-28</b>                                                                           | RhB      | Visible                 | 90    | -     | <b>This Study</b> |
| <b>PCP-29</b>                                                                           | RhB      | Visible                 | 90    | 91.72 | <b>This Study</b> |

Hcpip : 2-(2-carboxyphenyl) imidazo(4,5-f)-(1,10)phenanthroline; bimb: 1,4-bis[(1H-imidazol-1-yl)methyl] benzene; 2,6-NDA: 2,6-naphthalenedicarboxylic acid; H<sub>4</sub>L : bis-(3,5-dicarboxyphenyl) terephthalamide; H<sub>2</sub>L : 2,2'-bipyridine-4,4'-dicarboxylic acid.

## References

- [1] C. Sun, J. Jian, N. Lv, X. Xue, J. Shi, T. Zhou, L. Zhao, Y. Qiao, G. Che, "Synthesis, characterization, selective degradation of organic dyes and mechanism study of two novel Mn(II)-based coordination polymers" *J. Mol. Struct.* **2025**, 1327, 141114.
- [2] K. Li, S. J. Li, W. J. Shi, X. Y. Zhang, Y. L. Li, "Enhanced photocatalytic degradation of MB dye by Mn/Co-MOFs with mixed ligands" *J. Mol. Struct.* **2026**, 1366, 145955.
- [3] Y. Wu, M. K. Ghosh, Y. Lv, X. Hou, X. Wang, J. Wang, T. K. Ghorai, M. Muddassir, J. Guo, "Synthesis and characterization Mn(II) and Co(II) based coordination polymer and photocatalytic activity against methyl violet" *Polyhedron* **2023**, 243, 116575.
- [4] S. T. Karunakaran, R. Pavithran, M. Sajeew, S. M. M. Rema, "Photocatalytic degradation of methylene blue using a manganese based metal organic framework" *Results Chem.* **2022**, 4, 100504.
- [5] J. Du, X. Yang, F. Yuan, "A new Mn(II) coordination polymer and its application in the degradation of alizarin" *J. Coord. Chem.* **2024**, 77, 983–990.
- [6] F. Wang, C. Wang, Z. Yu, K. Xu, X. Li, Y. Fu, "Two multifunctional Mn(II) metal-organic frameworks: Synthesis, structures and applications as photocatalysis and luminescent sensor" *Polyhedron* **2016**, 105, 49–55.
